# Supplementary material for: Inhibition of JAK2 Suppresses Myelopoiesis and Atherosclerosis in Apoe−/− Mice
Source: PubMed Central journal article supplement (PMC7125070; doi:10.1007/s10557-020-06943-9), 2020-02-21

# Supplemental Figure 1

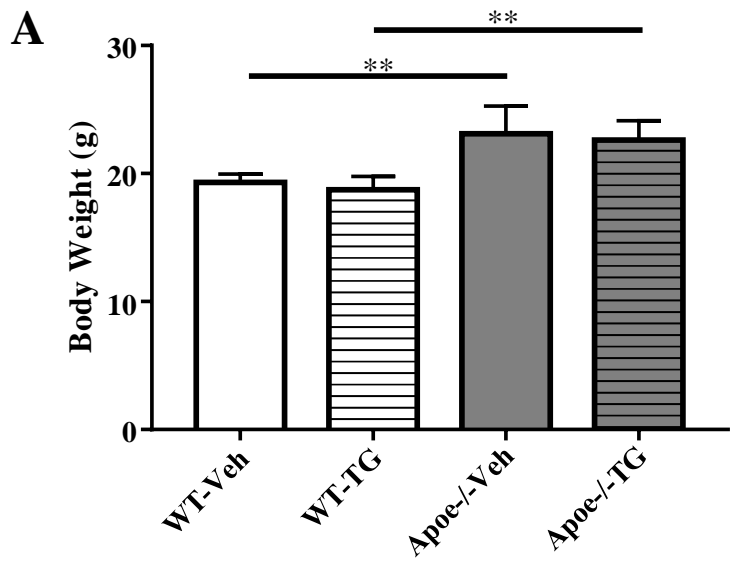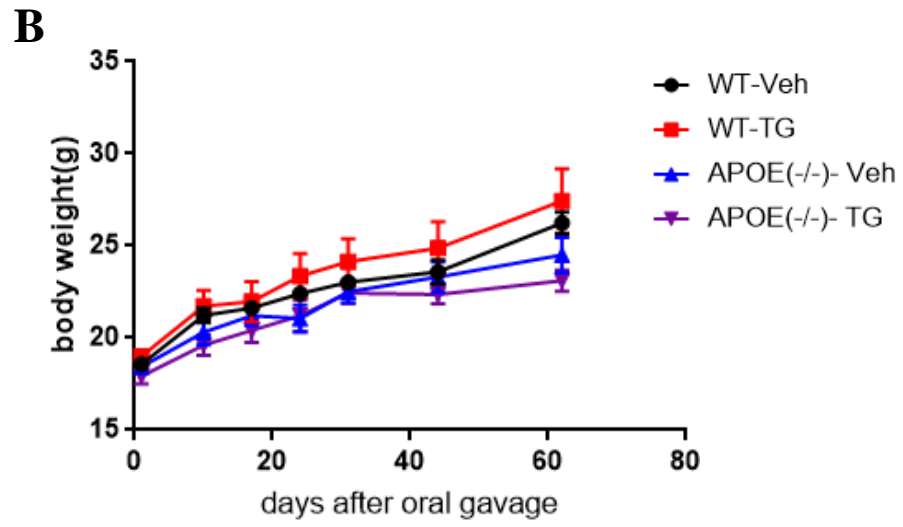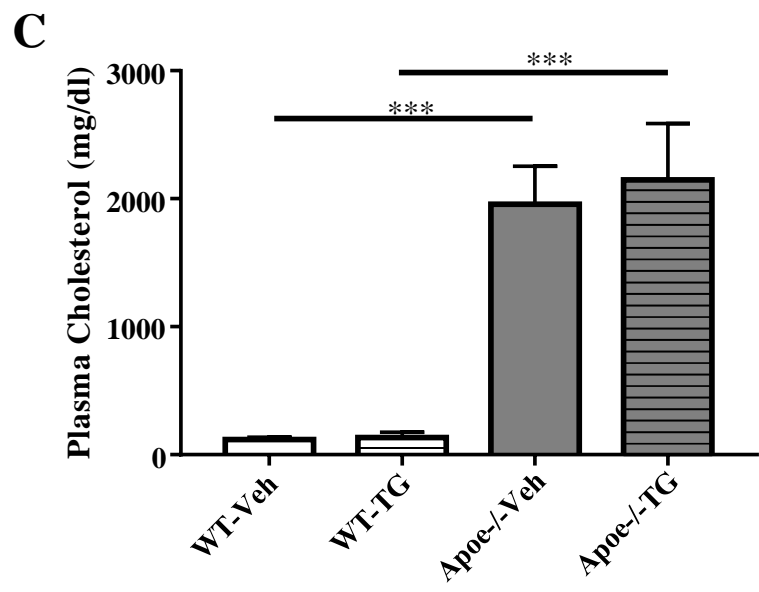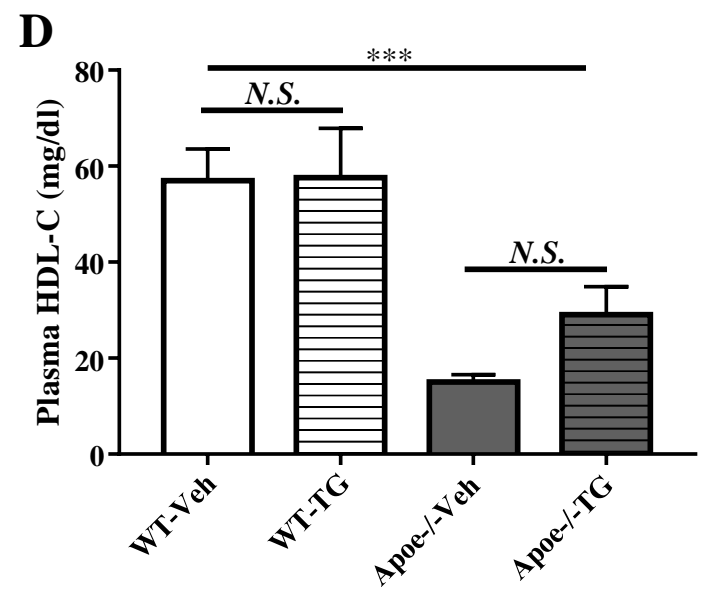

# Supplemental Figure 2

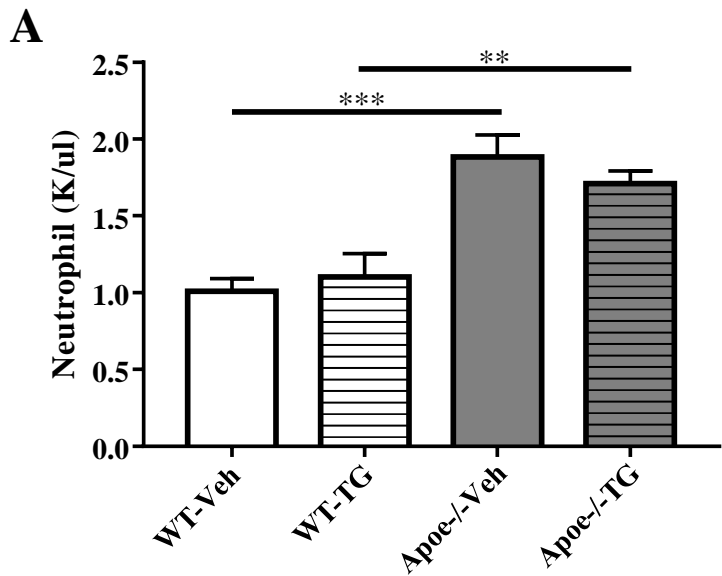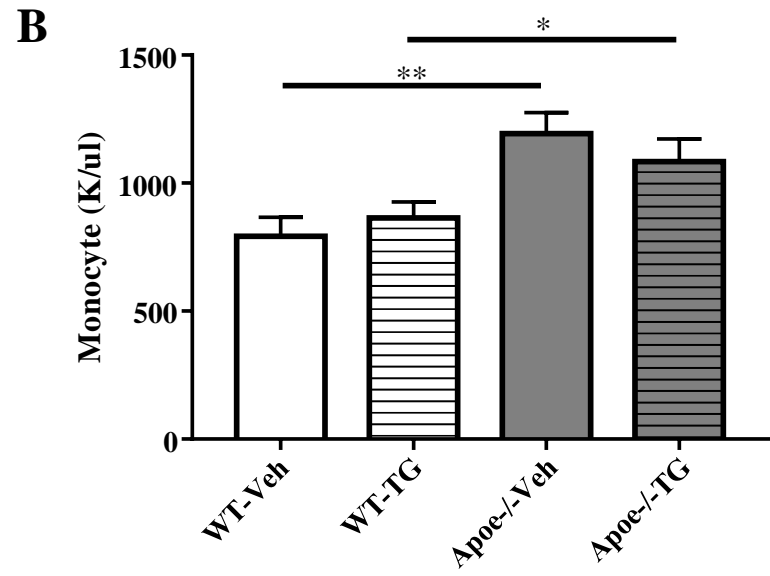

# Supplemental Figure 3

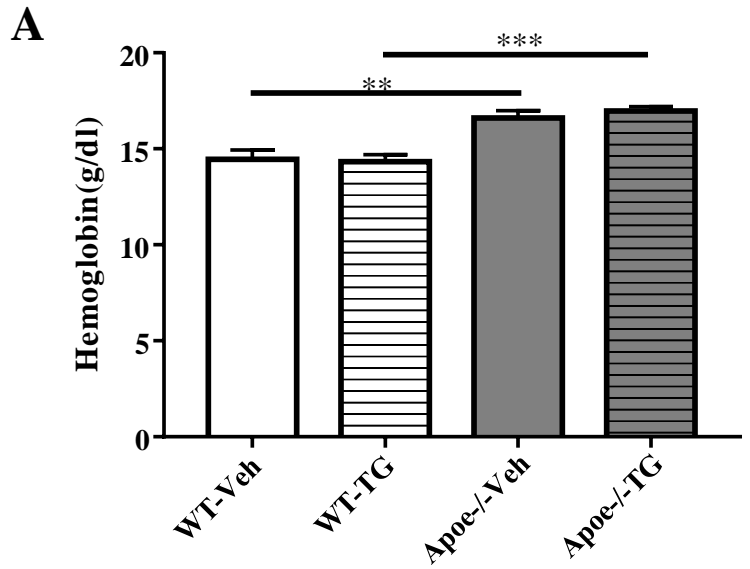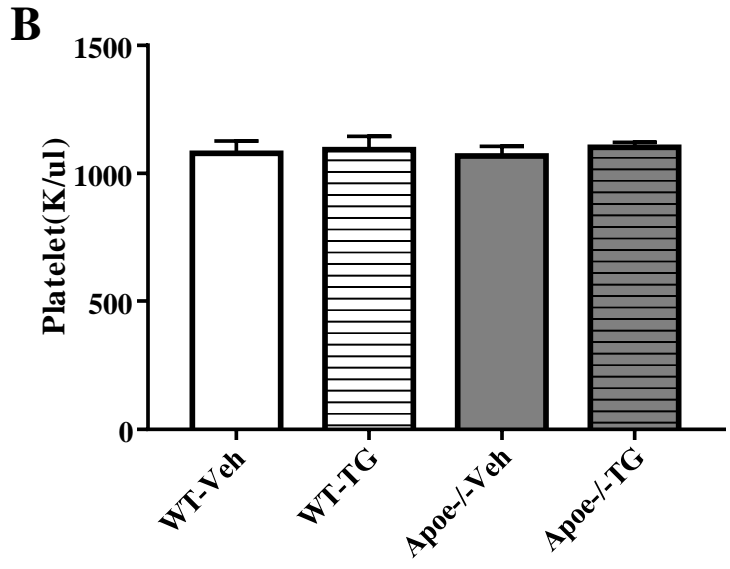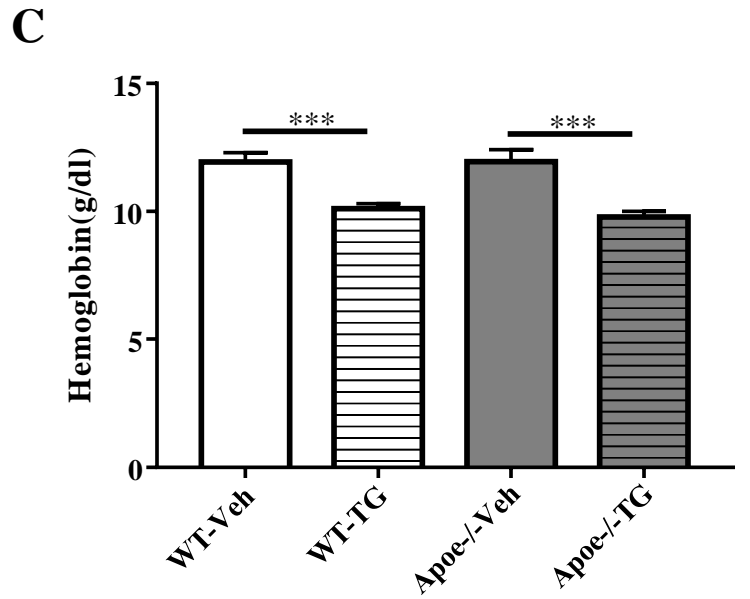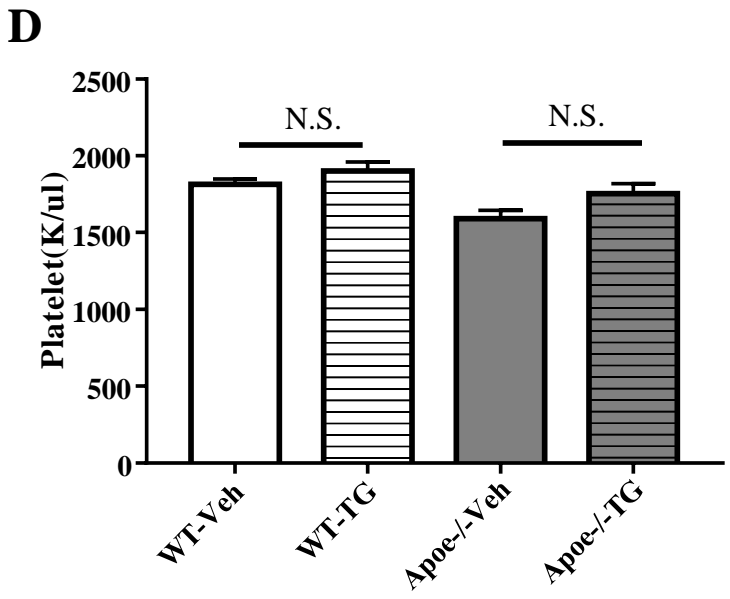

**Supplemental Figure 4**

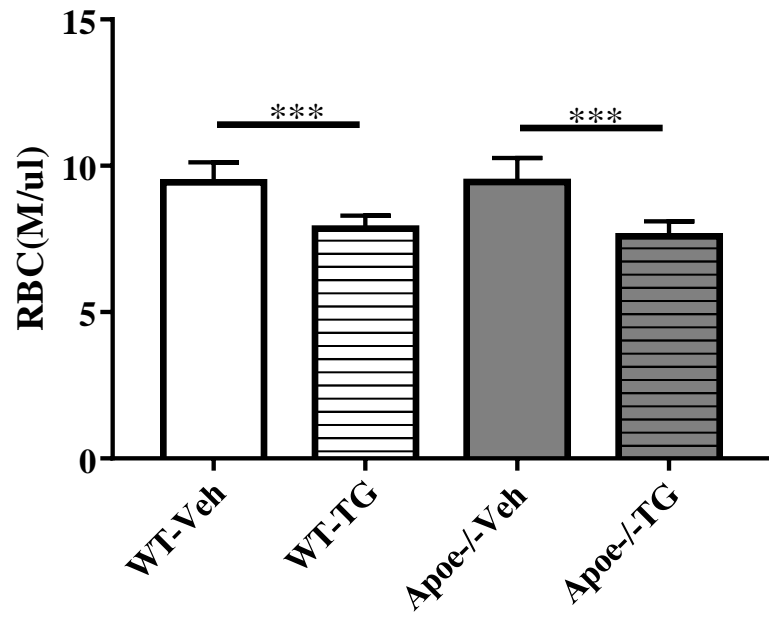

# Supplemental Figure 5

## Blood cells gating strategy

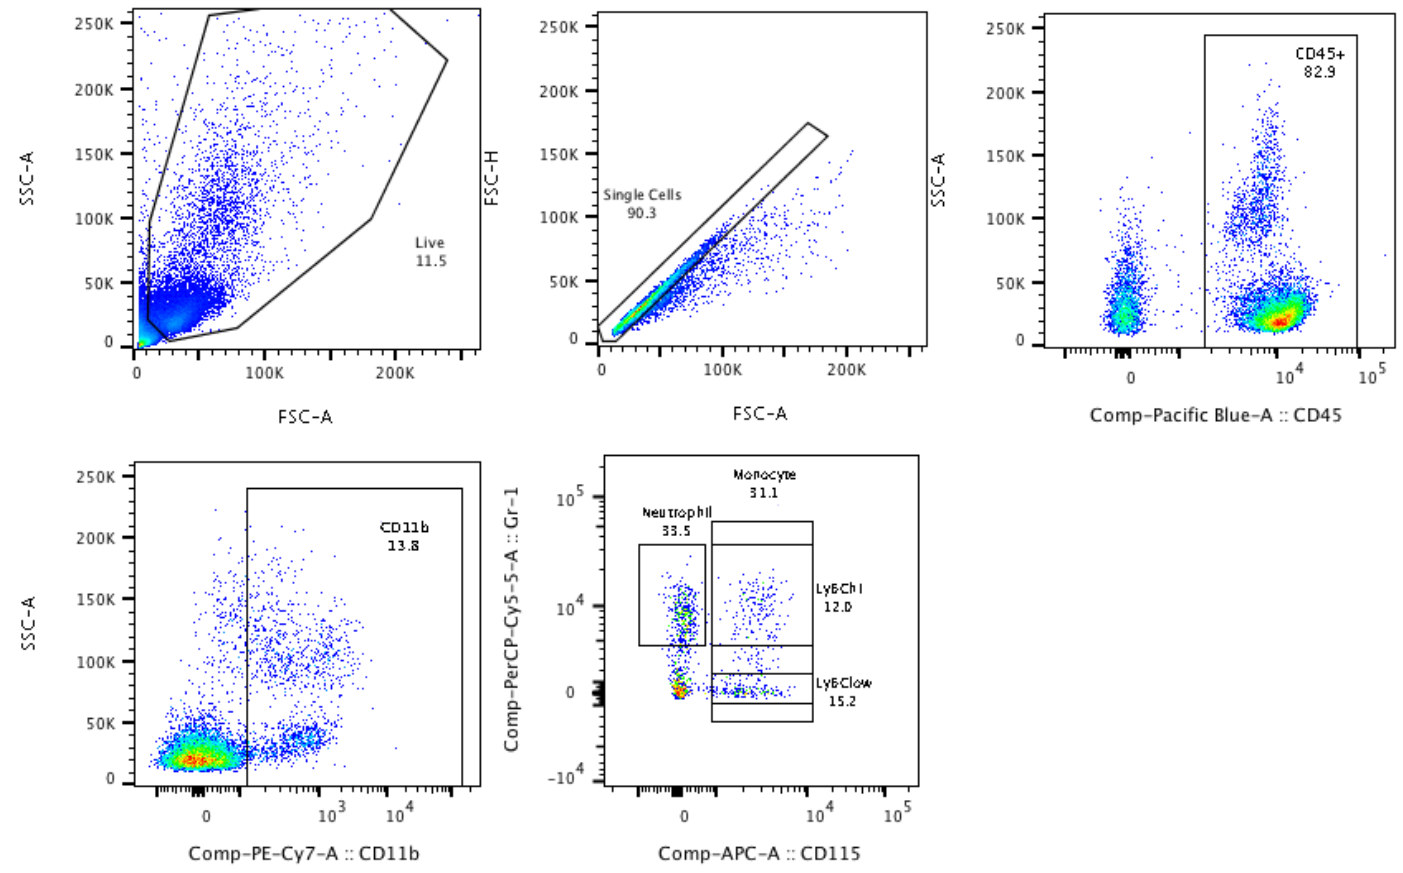

# Supplemental Figure 6

**A**

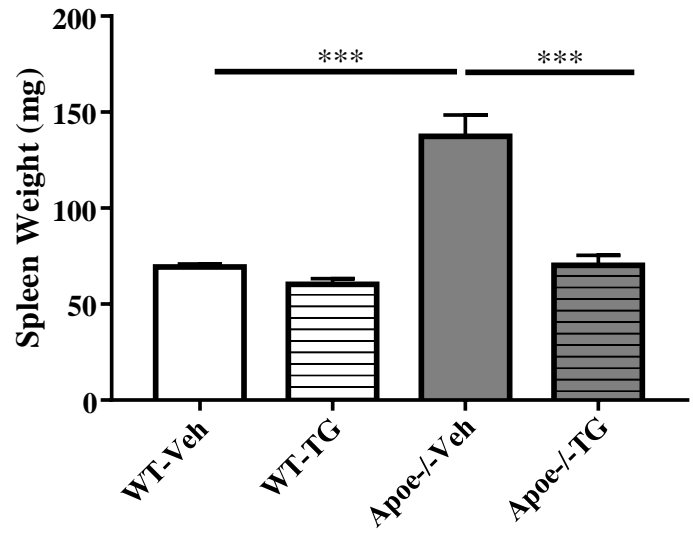

**B**

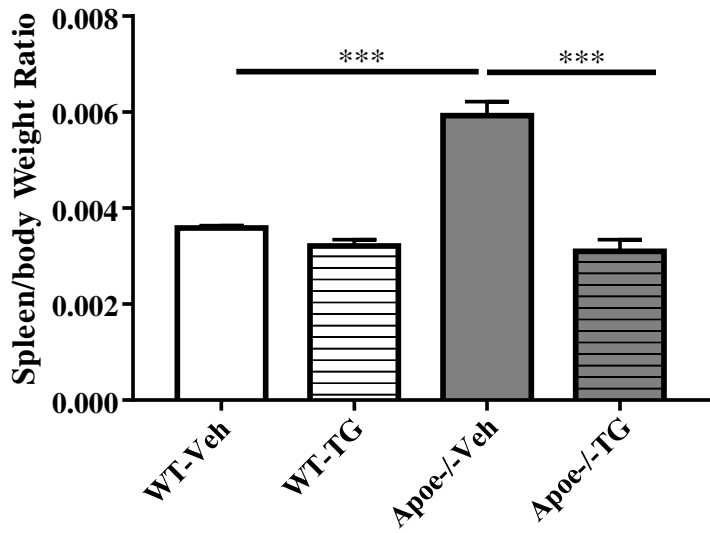

# Supplemental Figure 7

**A**

**HSPC\_p-STAT5**

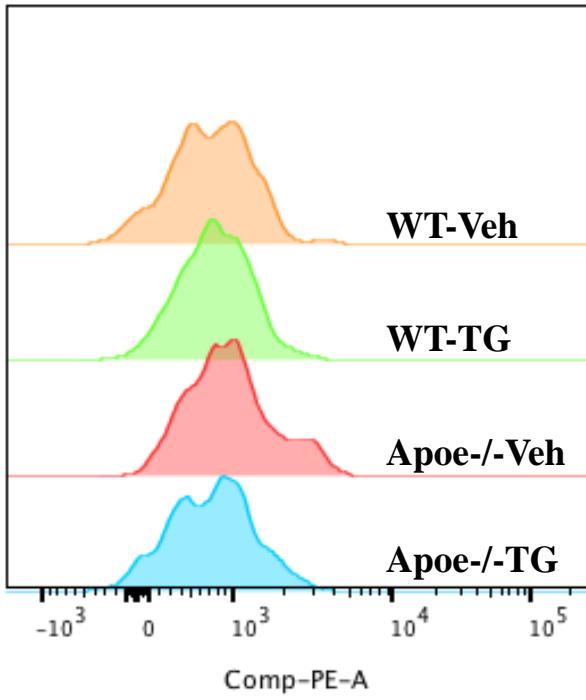

**B**

**HSPC\_p-ERK1/2**

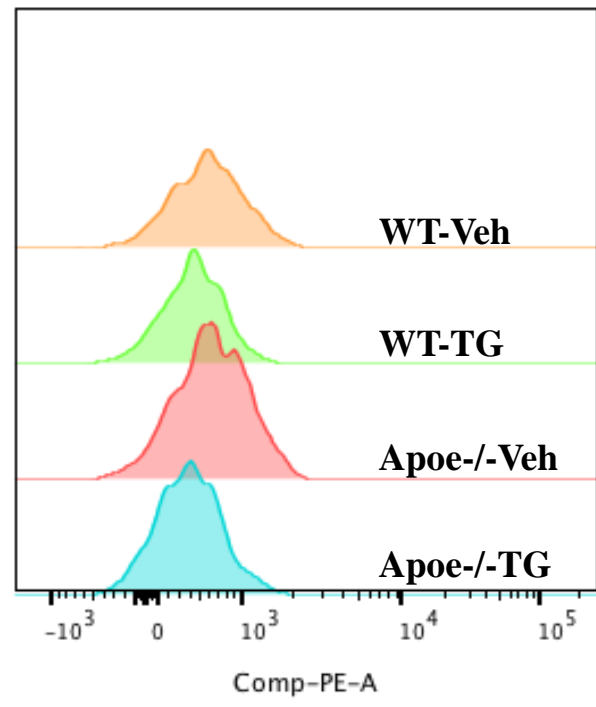

# Supplemental Figure 8

## Hematopoietic progenitors gating strategy

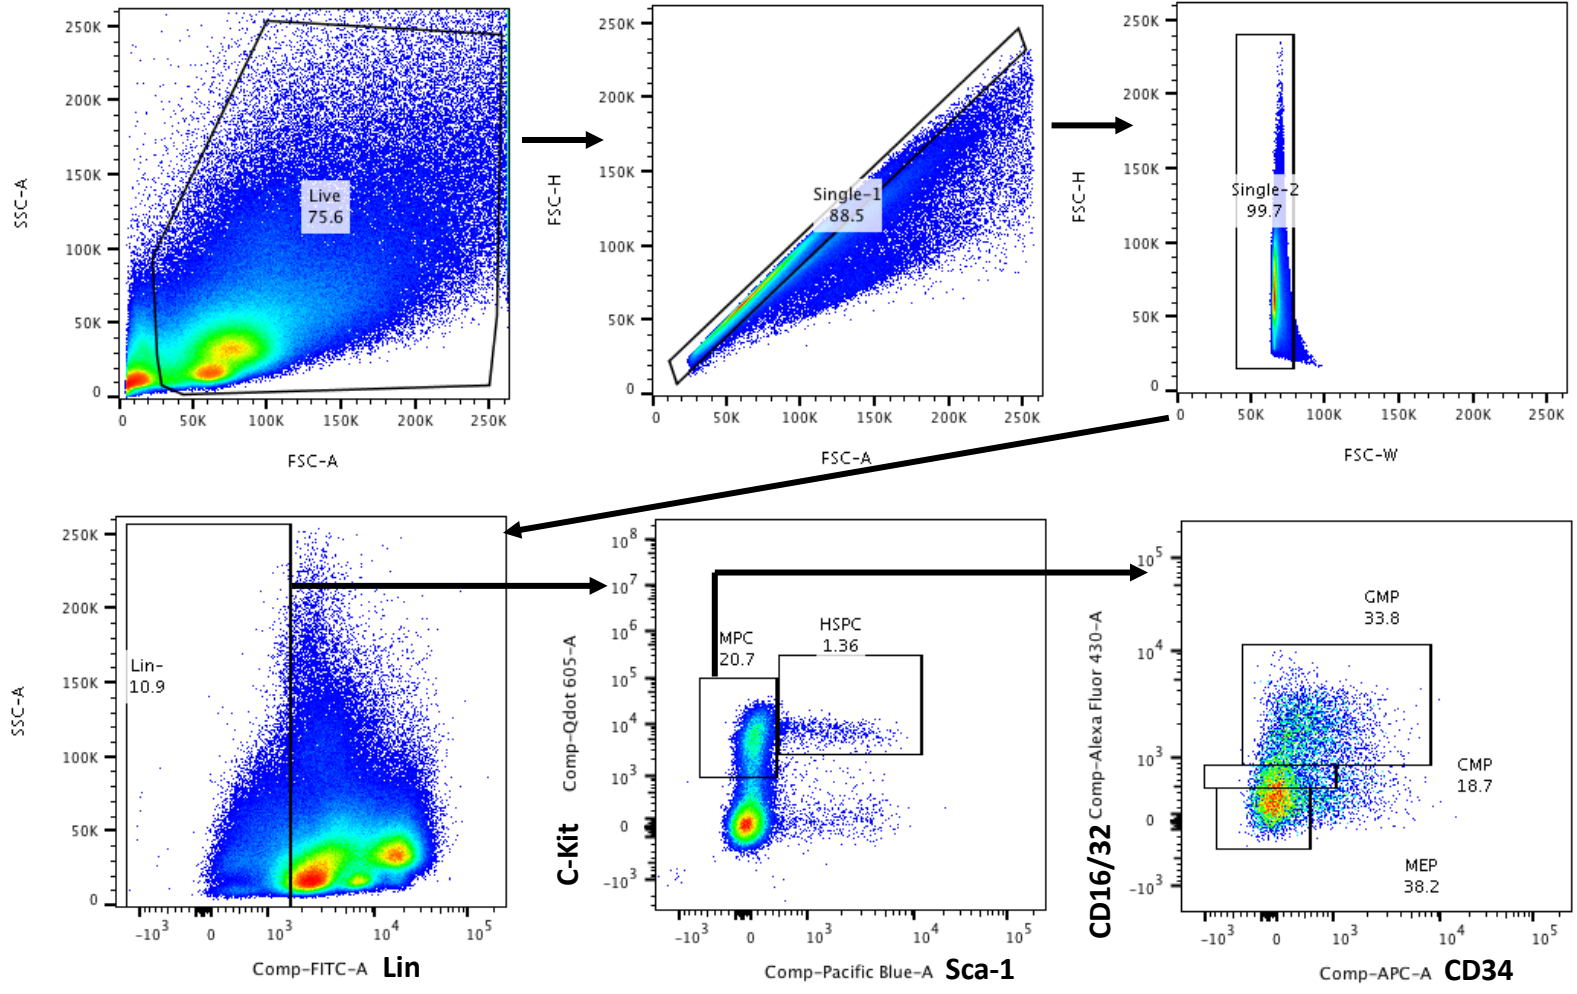

Supplement: 10557_2020_6943_MOESM1_ESM.pdf [file 10557_2020_6943_MOESM1_ESM.pdf]
